# Supplementary material for: Deep Learning Algorithm for Automated Segmentation and Volume Measurement of the Liver and Spleen Using Portal Venous Phase Computed Tomography Images
Source: PubMed Central journal article supplement — Korean J Radiol. 2020 Jul 2;21(8):987–97. doi: 10.3348/kjr.2020.0237 (PMC7369202; doi:10.3348/kjr.2020.0237), 2020-07-02
Supplement: kjr-21-987-s002.pdf [file kjr-21-987-s002.pdf]

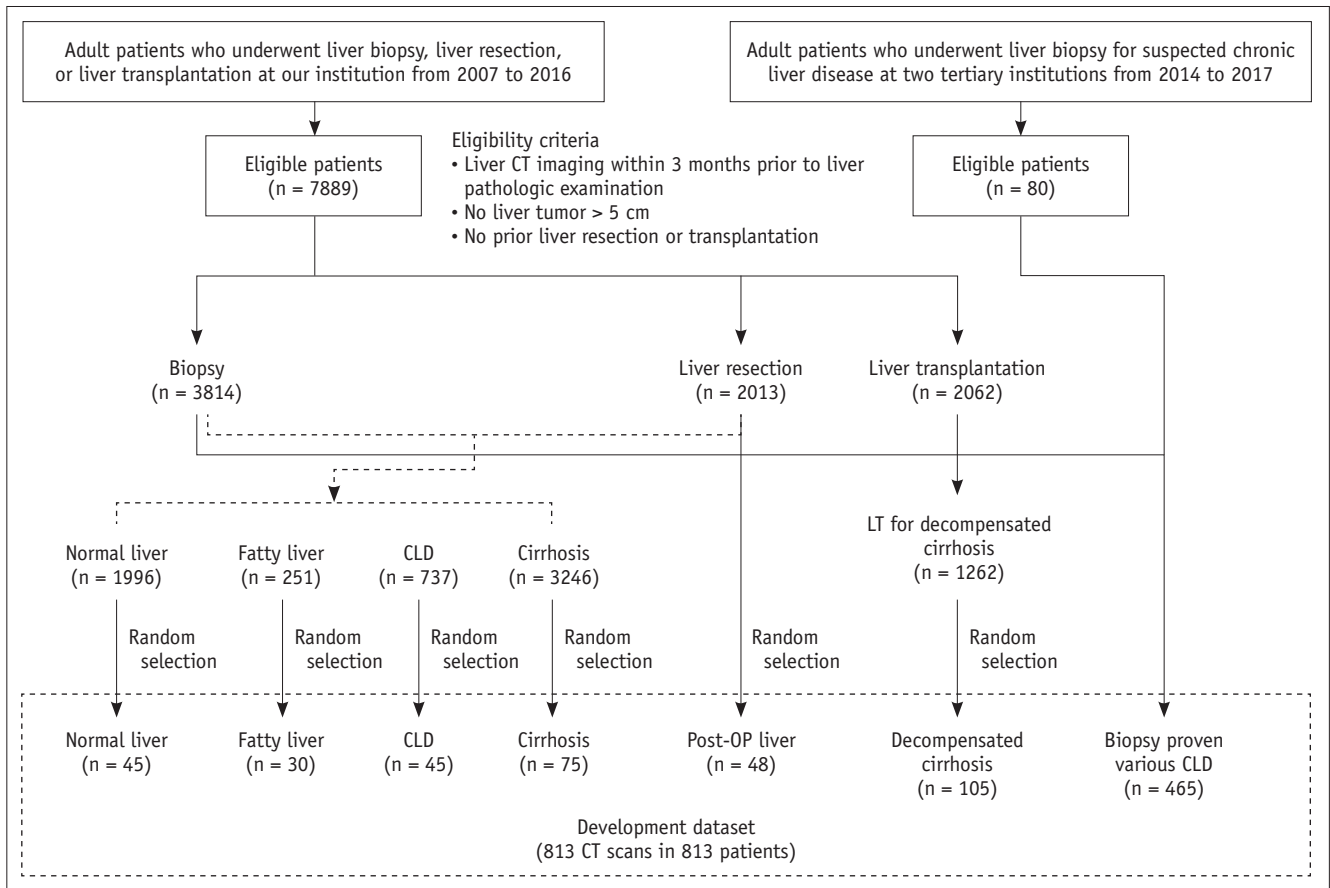

**Supplementary Fig. 1. Flow diagram of development dataset.** CLD = chronic liver disease, CT = computed tomography, LT = liver transplantation, OP = operative
