# Supplementary material for: Deep Learning Algorithm for Automated Segmentation and Volume Measurement of the Liver and Spleen Using Portal Venous Phase Computed Tomography Images
Source: PubMed Central journal article supplement — Korean J Radiol. 2020 Jul 2;21(8):987–97. doi: 10.3348/kjr.2020.0237 (PMC7369202; doi:10.3348/kjr.2020.0237), 2020-07-02
Supplement: kjr-21-987-s003.pdf [file kjr-21-987-s003.pdf]

**Supplementary Table 1. CT Imaging Techniques Used for Development and Test Datasets**

| CT techniques             | Development Dataset | Test Dataset-1 | Test Dataset-2 |               |
|---------------------------|---------------------|----------------|----------------|---------------|
|                           |                     |                | External Data  | Internal Data |
| No. of patients           | 813                 | 150            | 50             | 50            |
| CT detector configuration |                     |                |                |               |
| 2–8 detectors             | 91 (11.2)           | 0 (0.0)        | 2 (4.0)        | 0 (0.0)       |
| 16–64 detectors           | 491 (60.4)          | 58 (38.7)      | 34 (68.0)      | 21 (42.0)     |
| ≥ 128 detectors           | 231 (28.4)          | 92 (61.3)      | 14 (28.0)      | 29 (58.0)     |
| Tube voltage (kVp)        |                     |                |                |               |
| 100                       | 60 (7.4)            | 91 (60.7)      | 13 (26.0)      | 28 (56.0)     |
| 120                       | 753 (92.6)          | 59 (39.3)      | 33 (66.0)      | 22 (44.0)     |
| 130                       | 1 (0.1)             | 0 (0.0)        | 4 (8.0)        | 0 (0.0)       |
| Slice thickness (mm)      |                     |                |                |               |
| 2–4                       | 206 (25.3)          | 9 (6.0)        | 0 (0.0)        | 0 (0.0)       |
| 5                         | 607 (74.7)          | 141 (94.0)     | 50 (100.0)     | 50 (100.0)    |
| CT vendor                 |                     |                |                |               |
| Siemens                   | 543 (66.8)          | 112 (74.7)     | 26 (52.0)      | 35 (70.0)     |
| GE                        | 243 (29.9)          | 38 (25.3)      | 16 (32.0)      | 15 (30.0)     |
| Philips                   | 17 (2.1)            | 0 (0.0)        | 6 (12.0)       | 0 (0.0)       |
| Others*                   | 10 (1.2)            | 0 (0.0)        | 2 (4.0)        | 0 (0.0)       |

Data are expressed as number of participants; data in parentheses are percentages. \*Included Hitachi Medical and Toshiba. kVp = peak kilovoltage
