# Supplementary material for: Deep Learning Algorithm for Automated Segmentation and Volume Measurement of the Liver and Spleen Using Portal Venous Phase Computed Tomography Images
Source: PubMed Central journal article supplement — Korean J Radiol. 2020 Jul 2;21(8):987–97. doi: 10.3348/kjr.2020.0237 (PMC7369202; doi:10.3348/kjr.2020.0237), 2020-07-02
Supplement: kjr-21-987-s005.pdf [file kjr-21-987-s005.pdf]

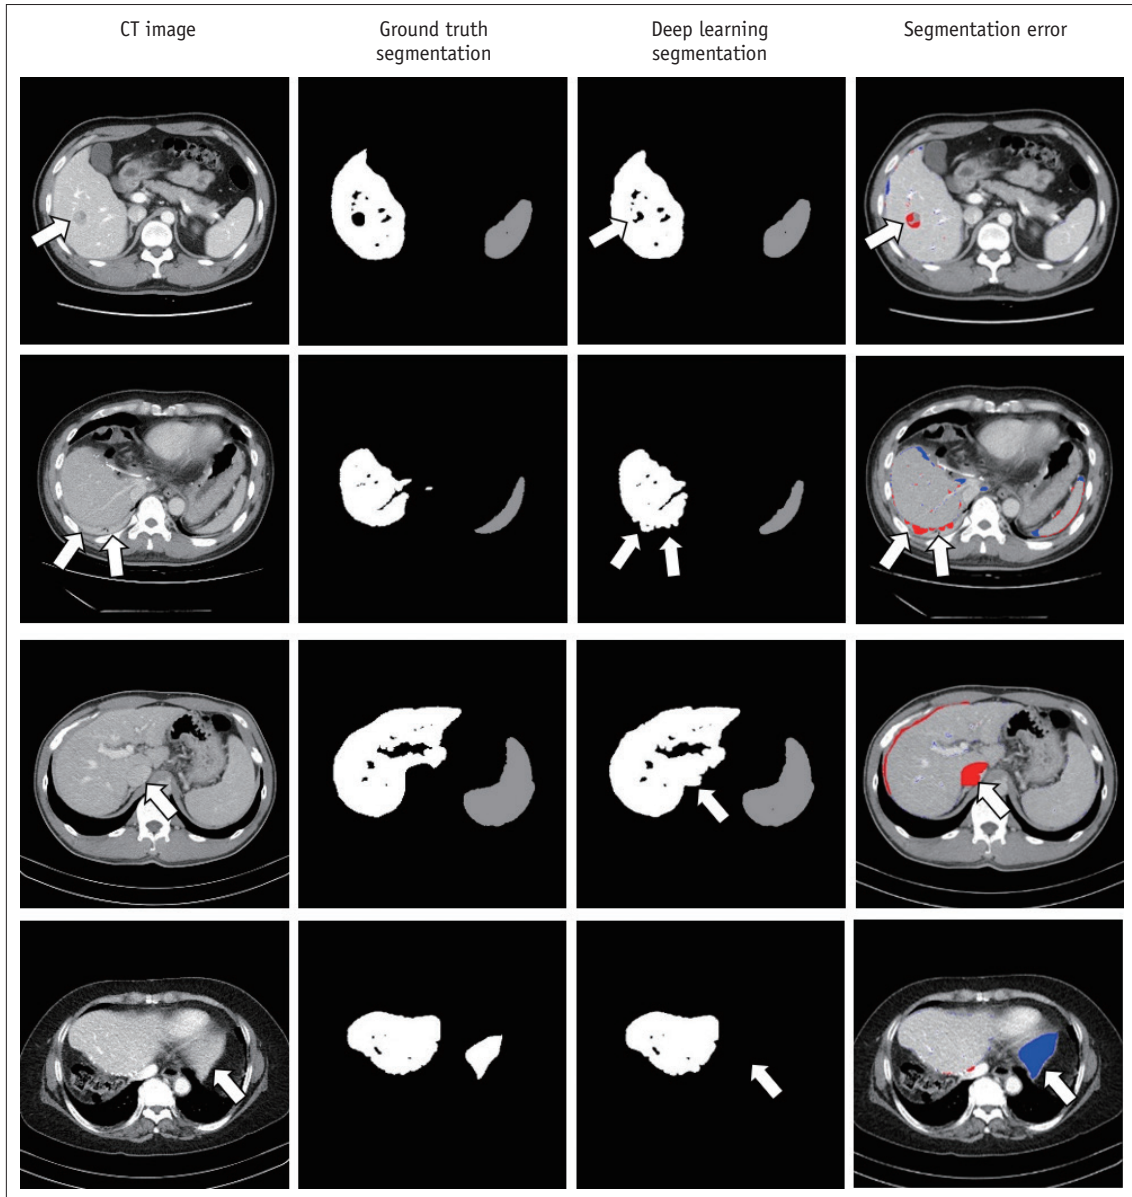

**Supplementary Fig. 3. Representative images showing examples of segmentation errors generated by deep learning algorithm in test dataset-1.** Each row demonstrates original CT image, image of ground truth segmentation, image of deep learning segmentation, and image of segmentation error overlaid on CT image (red mask = false-positive segmentation; blue mask = false-negative segmentation). First row: deep learning algorithm falsely segmented part of hepatocellular carcinoma (arrow) as liver. Second row: on CT image in patient in immediate post-hepatectomy state, deep learning algorithm falsely segmented atelectatic lung (arrows) as liver. Third row: deep learning algorithm yielded false positive segmentation of inferior vena cava (arrow) as liver. Fourth row: deep learning algorithm made false negative segmentation of left liver dome area (arrow).
